# Supplementary material
Source: publisher figshare collection journal article supplement (https://sage.figshare.com/ndownloader/files/20420667)
Supplement: Supplementary file 1 [file 20420667]

**Supplementary Materials**

1. **Correlations among all individual-level variables**
2. **Factor structure of gender norms measure**

**Correlations among all individual-level variables**

**Table S1**

*Correlations among all individual-level variables for each country*

| **Argentina** | **1** | **2** | **3** | **4** | **5** | **6** | **7** | **8** |
| --- | --- | --- | --- | --- | --- | --- | --- | --- |
| 1. Gay men | 1 | 0.865 | -0.486 | 0.126 | -0.177 | 0.031 | 0.054 | -0.248 |
| 1. Lesbian women | 0.865 | 1 | -0.464 | 0.106 | -0.203 | 0.038 | 0.078 | -0.286 |
| 1. Gender norm | -0.486 | -0.464 | 1 | -0.216 | 0.211 | -0.08 | -0.056 | 0.384 |
| 1. Female (vs. male) | 0.126 | 0.106 | -0.216 | 1 | 0.095 | 0.068 | 0.037 | 0.05 |
| 1. Age | -0.177 | -0.203 | 0.211 | 0.095 | 1 | 0.191 | 0.097 | 0.075 |
| 1. Income | 0.031 | 0.038 | -0.08 | 0.068 | 0.191 | 1 | 0.103 | -0.101 |
| 1. Education | 0.054 | 0.078 | -0.056 | 0.037 | 0.097 | 0.103 | 1 | 0.013 |
| 1. Religiosity | -0.248 | -0.286 | 0.384 | 0.05 | 0.075 | -0.101 | 0.013 | 1 |
| **Australia** | **1** | **2** | **3** | **4** | **5** | **6** | **7** | **8** |
| 1. Gay men | 1 | 0.845 | -0.386 | 0.215 | -0.23 | 0.072 | 0.121 | -0.221 |
| 1. Lesbian women | 0.845 | 1 | -0.317 | 0.128 | -0.171 | 0.109 | 0.045 | -0.255 |
| 1. Gender norm | -0.386 | -0.317 | 1 | -0.182 | 0.165 | -0.023 | -0.188 | 0.296 |
| 1. Female (vs. male) | 0.215 | 0.128 | -0.182 | 1 | -0.442 | -0.155 | 0.09 | 0.045 |
| 1. Age | -0.23 | -0.171 | 0.165 | -0.442 | 1 | 0.03 | -0.246 | -0.055 |
| 1. Income | 0.072 | 0.109 | -0.023 | -0.155 | 0.03 | 1 | 0.243 | -0.016 |
| 1. Education | 0.121 | 0.045 | -0.188 | 0.09 | -0.246 | 0.243 | 1 | 0.095 |
| 1. Religiosity | -0.221 | -0.255 | 0.296 | 0.045 | -0.055 | -0.016 | 0.095 | 1 |
| **Belgium** | **1** | **2** | **3** | **4** | **5** | **6** | **7** | **8** |
| 1. Gay men | 1 | 0.867 | -0.251 | 0.135 | -0.139 | -0.055 | 0.107 | -0.109 |
| 1. Lesbian women | 0.867 | 1 | -0.234 | 0.054 | -0.108 | -0.029 | 0.08 | -0.107 |
| 1. Gender norm | -0.251 | -0.234 | 1 | -0.204 | 0.141 | -0.137 | -0.195 | 0.239 |
| 1. Female (vs. male) | 0.135 | 0.054 | -0.204 | 1 | -0.213 | 0.027 | 0.119 | 0.036 |
| 1. Age | -0.139 | -0.108 | 0.141 | -0.213 | 1 | -0.121 | -0.213 | -0.063 |
| 1. Income | -0.055 | -0.029 | -0.137 | 0.027 | -0.121 | 1 | 0.237 | -0.06 |
| 1. Education | 0.107 | 0.08 | -0.195 | 0.119 | -0.213 | 0.237 | 1 | -0.047 |
| 1. Religiosity | -0.109 | -0.107 | 0.239 | 0.036 | -0.063 | -0.06 | -0.047 | 1 |
| **Brazil** | **1** | **2** | **3** | **4** | **5** | **6** | **7** | **8** |
| 1. Gay men | 1 | 0.867 | -0.278 | 0.076 | -0.119 | 0.069 | 0.107 | -0.164 |
| 1. Lesbian women | 0.867 | 1 | -0.266 | 0.017 | -0.125 | 0.101 | 0.114 | -0.198 |
| 1. Gender norm | -0.278 | -0.266 | 1 | -0.167 | 0.122 | -0.087 | -0.119 | 0.321 |
| 1. Female (vs. male) | 0.076 | 0.017 | -0.167 | 1 | -0.14 | -0.175 | -0.035 | 0.077 |
| 1. Age | -0.119 | -0.125 | 0.122 | -0.14 | 1 | 0.223 | 0.03 | 0.031 |
| 1. Income | 0.069 | 0.101 | -0.087 | -0.175 | 0.223 | 1 | 0.322 | 0.007 |
| 1. Education | 0.107 | 0.114 | -0.119 | -0.035 | 0.03 | 0.322 | 1 | -0.043 |
| 1. Religiosity | -0.164 | -0.198 | 0.321 | 0.077 | 0.031 | 0.007 | -0.043 | 1 |
| **Canada** | **1** | **2** | **3** | **4** | **5** | **6** | **7** | **8** |
| 1. Gay men | 1 | 0.871 | -0.364 | 0.164 | -0.119 | 0.039 | 0.065 | -0.224 |
| 1. Lesbian women | 0.871 | 1 | -0.303 | 0.062 | -0.122 | 0.008 | 0.046 | -0.237 |
| 1. Gender norm | -0.364 | -0.303 | 1 | -0.247 | 0.075 | -0.043 | -0.126 | 0.271 |
| 1. Female (vs. male) | 0.164 | 0.062 | -0.247 | 1 | -0.215 | 0.087 | 0.002 | -0.052 |
| 1. Age | -0.119 | -0.122 | 0.075 | -0.215 | 1 | 0.166 | -0.127 | 0.048 |
| 1. Income | 0.039 | 0.008 | -0.043 | 0.087 | 0.166 | 1 | 0.236 | -0.083 |
| 1. Education | 0.065 | 0.046 | -0.126 | 0.002 | -0.127 | 0.236 | 1 | 0.04 |
| 1. Religiosity | -0.224 | -0.237 | 0.271 | -0.052 | 0.048 | -0.083 | 0.04 | 1 |
| **China** | **1** | **2** | **3** | **4** | **5** | **6** | **7** | **8** |
| 1. Gay men | 1 | 0.753 | 0.066 | 0.204 | -0.18 | -0.004 | 0.107 | 0.318 |
| 1. Lesbian women | 0.753 | 1 | 0.114 | 0.104 | -0.171 | -0.01 | 0.127 | 0.335 |
| 1. Gender norm | 0.066 | 0.114 | 1 | -0.15 | 0.152 | 0.073 | 0.028 | 0.306 |
| 1. Female (vs. male) | 0.204 | 0.104 | -0.15 | 1 | -0.168 | 0.046 | 0.024 | 0.043 |
| 1. Age | -0.18 | -0.171 | 0.152 | -0.168 | 1 | 0.088 | -0.2 | -0.09 |
| 1. Income | -0.004 | -0.01 | 0.073 | 0.046 | 0.088 | 1 | 0.195 | 0.048 |
| 1. Education | 0.107 | 0.127 | 0.028 | 0.024 | -0.2 | 0.195 | 1 | 0.091 |
| 1. Religiosity | 0.318 | 0.335 | 0.306 | 0.043 | -0.09 | 0.048 | 0.091 | 1 |
| **France** | **1** | **2** | **3** | **4** | **5** | **6** | **7** | **8** |
| 1. Gay men | 1 | 0.894 | -0.311 | 0.162 | -0.127 | -0.004 | 0.045 | -0.154 |
| 1. Lesbian women | 0.894 | 1 | -0.267 | 0.108 | -0.099 | 0.002 | 0.041 | -0.167 |
| 1. Gender norm | -0.311 | -0.267 | 1 | -0.095 | 0.172 | -0.063 | -0.209 | 0.307 |
| 1. Female (vs. male) | 0.162 | 0.108 | -0.095 | 1 | -0.129 | -0.219 | -0.13 | 0.026 |
| 1. Age | -0.127 | -0.099 | 0.172 | -0.129 | 1 | 0.116 | -0.292 | -0.008 |
| 1. Income | -0.004 | 0.002 | -0.063 | -0.219 | 0.116 | 1 | 0.234 | -0.04 |
| 1. Education | 0.045 | 0.041 | -0.209 | -0.13 | -0.292 | 0.234 | 1 | -0.004 |
| 1. Religiosity | -0.154 | -0.167 | 0.307 | 0.026 | -0.008 | -0.04 | -0.004 | 1 |
| **Germany** | **1** | **2** | **3** | **4** | **5** | **6** | **7** | **8** |
| 1. Gay men | 1 | 0.761 | -0.209 | 0.126 | -0.111 | 0.03 | 0.058 | -0.06 |
| 1. Lesbian women | 0.761 | 1 | -0.166 | -0.007 | -0.094 | 0.025 | 0.044 | -0.087 |
| 1. Gender norm | -0.209 | -0.166 | 1 | -0.147 | -0.022 | 0.069 | -0.128 | 0.206 |
| 1. Female (vs. male) | 0.126 | -0.007 | -0.147 | 1 | -0.031 | -0.029 | 0.01 | 0.014 |
| 1. Age | -0.111 | -0.094 | -0.022 | -0.031 | 1 | -0.061 | -0.068 | -0.097 |
| 1. Income | 0.03 | 0.025 | 0.069 | -0.029 | -0.061 | 1 | 0.192 | 0.029 |
| 1. Education | 0.058 | 0.044 | -0.128 | 0.01 | -0.068 | 0.192 | 1 | -0.002 |
| 1. Religiosity | -0.06 | -0.087 | 0.206 | 0.014 | -0.097 | 0.029 | -0.002 | 1 |
| **Hungary** | **1** | **2** | **3** | **4** | **5** | **6** | **7** | **8** |
| 1. Gay men | 1 | 0.541 | -0.344 | 0.204 | -0.08 | -0.065 | 0.038 | -0.095 |
| 1. Lesbian women | 0.541 | 1 | -0.216 | -0.074 | -0.131 | -0.005 | -0.016 | -0.172 |
| 1. Gender norm | -0.344 | -0.216 | 1 | -0.06 | 0.065 | -0.101 | -0.19 | 0.232 |
| 1. Female (vs. male) | 0.204 | -0.074 | -0.06 | 1 | -0.161 | -0.147 | 0.043 | 0.017 |
| 1. Age | -0.08 | -0.131 | 0.065 | -0.161 | 1 | 0.048 | -0.109 | -0.054 |
| 1. Income | -0.065 | -0.005 | -0.101 | -0.147 | 0.048 | 1 | 0.284 | -0.037 |
| 1. Education | 0.038 | -0.016 | -0.19 | 0.043 | -0.109 | 0.284 | 1 | 0.049 |
| 1. Religiosity | -0.095 | -0.172 | 0.232 | 0.017 | -0.054 | -0.037 | 0.049 | 1 |
| **India** | **1** | **2** | **3** | **4** | **5** | **6** | **7** | **8** |
| 1. Gay men | 1 | 0.77 | 0.047 | 0.148 | -0.192 | -0.002 | -0.061 | -0.041 |
| 1. Lesbian women | 0.77 | 1 | 0.055 | 0.082 | -0.188 | 0.016 | -0.062 | -0.111 |
| 1. Gender norm | 0.047 | 0.055 | 1 | -0.163 | 0.044 | -0.03 | 0.079 | 0.373 |
| 1. Female (vs. male) | 0.148 | 0.082 | -0.163 | 1 | -0.342 | -0.002 | -0.068 | -0.027 |
| 1. Age | -0.192 | -0.188 | 0.044 | -0.342 | 1 | 0.185 | 0.194 | 0.038 |
| 1. Income | -0.002 | 0.016 | -0.03 | -0.002 | 0.185 | 1 | 0.123 | -0.029 |
| 1. Education | -0.061 | -0.062 | 0.079 | -0.068 | 0.194 | 0.123 | 1 | 0.045 |
| 1. Religiosity | -0.041 | -0.111 | 0.373 | -0.027 | 0.038 | -0.029 | 0.045 | 1 |
| **Italy** | **1** | **2** | **3** | **4** | **5** | **6** | **7** | **8** |
| 1. Gay men | 1 | 0.854 | -0.303 | 0.173 | -0.146 | -0.041 | 0.134 | -0.137 |
| 1. Lesbian women | 0.854 | 1 | -0.267 | 0.115 | -0.155 | -0.063 | 0.126 | -0.133 |
| 1. Gender norm | -0.303 | -0.267 | 1 | -0.149 | 0.074 | 0 | -0.112 | 0.3 |
| 1. Female (vs. male) | 0.173 | 0.115 | -0.149 | 1 | 0.02 | -0.141 | 0.012 | 0.046 |
| 1. Age | -0.146 | -0.155 | 0.074 | 0.02 | 1 | 0.078 | -0.18 | 0.05 |
| 1. Income | -0.041 | -0.063 | 0 | -0.141 | 0.078 | 1 | 0.234 | 0.014 |
| 1. Education | 0.134 | 0.126 | -0.112 | 0.012 | -0.18 | 0.234 | 1 | -0.048 |
| 1. Religiosity | -0.137 | -0.133 | 0.3 | 0.046 | 0.05 | 0.014 | -0.048 | 1 |
| **Japan** | **1** | **2** | **3** | **4** | **5** | **6** | **7** | **8** |
| 1. Gay men | 1 | 0.683 | -0.22 | 0.232 | -0.209 | 0.002 | -0.029 | 0.024 |
| 1. Lesbian women | 0.683 | 1 | -0.141 | 0.131 | -0.191 | -0.028 | -0.024 | 0.068 |
| 1. Gender norm | -0.22 | -0.141 | 1 | -0.263 | 0.238 | 0.081 | 0.043 | 0.17 |
| 1. Female (vs. male) | 0.232 | 0.131 | -0.263 | 1 | -0.296 | -0.034 | -0.171 | 0.011 |
| 1. Age | -0.209 | -0.191 | 0.238 | -0.296 | 1 | 0.136 | 0.09 | -0.069 |
| 1. Income | 0.002 | -0.028 | 0.081 | -0.034 | 0.136 | 1 | 0.18 | 0.072 |
| 1. Education | -0.029 | -0.024 | 0.043 | -0.171 | 0.09 | 0.18 | 1 | 0.009 |
| 1. Religiosity | 0.024 | 0.068 | 0.17 | 0.011 | -0.069 | 0.072 | 0.009 | 1 |
| **Mexico** | **1** | **2** | **3** | **4** | **5** | **6** | **7** | **8** |
| 1. Gay men | 1 | 0.825 | -0.241 | 0.038 | -0.172 | -0.01 | 0.077 | -0.202 |
| 1. Lesbian women | 0.825 | 1 | -0.222 | -0.05 | -0.143 | 0.028 | 0.081 | -0.189 |
| 1. Gender norm | -0.241 | -0.222 | 1 | -0.16 | 0.246 | -0.007 | 0.033 | 0.36 |
| 1. Female (vs. male) | 0.038 | -0.05 | -0.16 | 1 | -0.102 | -0.014 | -0.029 | 0.004 |
| 1. Age | -0.172 | -0.143 | 0.246 | -0.102 | 1 | 0.269 | 0.167 | 0.104 |
| 1. Income | -0.01 | 0.028 | -0.007 | -0.014 | 0.269 | 1 | 0.433 | -0.031 |
| 1. Education | 0.077 | 0.081 | 0.033 | -0.029 | 0.167 | 0.433 | 1 | -0.031 |
| 1. Religiosity | -0.202 | -0.189 | 0.36 | 0.004 | 0.104 | -0.031 | -0.031 | 1 |
| **Poland** | **1** | **2** | **3** | **4** | **5** | **6** | **7** | **8** |
| 1. Gay men | 1 | 0.794 | -0.377 | 0.144 | -0.072 | 0.089 | 0.093 | -0.18 |
| 1. Lesbian women | 0.794 | 1 | -0.341 | 0.012 | -0.094 | 0.077 | 0.072 | -0.242 |
| 1. Gender norm | -0.377 | -0.341 | 1 | -0.176 | 0.044 | -0.04 | -0.115 | 0.301 |
| 1. Female (vs. male) | 0.144 | 0.012 | -0.176 | 1 | 0.092 | -0.044 | -0.012 | 0.084 |
| 1. Age | -0.072 | -0.094 | 0.044 | 0.092 | 1 | -0.018 | 0.124 | 0.038 |
| 1. Income | 0.089 | 0.077 | -0.04 | -0.044 | -0.018 | 1 | 0.211 | -0.091 |
| 1. Education | 0.093 | 0.072 | -0.115 | -0.012 | 0.124 | 0.211 | 1 | 0.004 |
| 1. Religiosity | -0.18 | -0.242 | 0.301 | 0.084 | 0.038 | -0.091 | 0.004 | 1 |
| **South Africa** | **1** | **2** | **3** | **4** | **5** | **6** | **7** | **8** |
| 1. Gay men | 1 | 0.846 | -0.445 | 0.13 | -0.192 | 0.078 | 0.125 | -0.314 |
| 1. Lesbian women | 0.846 | 1 | -0.393 | 0.018 | -0.22 | 0.048 | 0.08 | -0.323 |
| 1. Gender norm | -0.445 | -0.393 | 1 | -0.214 | 0.234 | -0.079 | -0.112 | 0.289 |
| 1. Female (vs. male) | 0.13 | 0.018 | -0.214 | 1 | -0.112 | 0.048 | -0.051 | 0.052 |
| 1. Age | -0.192 | -0.22 | 0.234 | -0.112 | 1 | 0.214 | 0.025 | 0.034 |
| 1. Income | 0.078 | 0.048 | -0.079 | 0.048 | 0.214 | 1 | 0.236 | -0.08 |
| 1. Education | 0.125 | 0.08 | -0.112 | -0.051 | 0.025 | 0.236 | 1 | -0.09 |
| 1. Religiosity | -0.314 | -0.323 | 0.289 | 0.052 | 0.034 | -0.08 | -0.09 | 1 |
| **South Korea** | **1** | **2** | **3** | **4** | **5** | **6** | **7** | **8** |
| 1. Gay men | 1 | 0.734 | -0.055 | 0.201 | -0.188 | -0.05 | 0.044 | -0.021 |
| 1. Lesbian women | 0.734 | 1 | -0.024 | 0.071 | -0.113 | -0.028 | 0.007 | -0.07 |
| 1. Gender norm | -0.055 | -0.024 | 1 | -0.347 | 0.318 | 0.093 | 0.008 | 0.236 |
| 1. Female (vs. male) | 0.201 | 0.071 | -0.347 | 1 | -0.141 | -0.109 | -0.209 | 0.01 |
| 1. Age | -0.188 | -0.113 | 0.318 | -0.141 | 1 | 0.181 | -0.07 | 0.078 |
| 1. Income | -0.05 | -0.028 | 0.093 | -0.109 | 0.181 | 1 | 0.171 | -0.026 |
| 1. Education | 0.044 | 0.007 | 0.008 | -0.209 | -0.07 | 0.171 | 1 | 0.045 |
| 1. Religiosity | -0.021 | -0.07 | 0.236 | 0.01 | 0.078 | -0.026 | 0.045 | 1 |
| **Spain** | **1** | **2** | **3** | **4** | **5** | **6** | **7** | **8** |
| 1. Gay men | 1 | 0.892 | -0.279 | 0.12 | -0.108 | -0.057 | 0.012 | -0.2 |
| 1. Lesbian women | 0.892 | 1 | -0.26 | 0.106 | -0.107 | -0.073 | 0.015 | -0.2 |
| 1. Gender norm | -0.279 | -0.26 | 1 | -0.198 | 0.167 | 0.006 | -0.08 | 0.299 |
| 1. Female (vs. male) | 0.12 | 0.106 | -0.198 | 1 | -0.045 | -0.146 | -0.052 | -0.014 |
| 1. Age | -0.108 | -0.107 | 0.167 | -0.045 | 1 | 0.066 | -0.246 | 0.079 |
| 1. Income | -0.057 | -0.073 | 0.006 | -0.146 | 0.066 | 1 | 0.375 | 0.067 |
| 1. Education | 0.012 | 0.015 | -0.08 | -0.052 | -0.246 | 0.375 | 1 | 0.028 |
| 1. Religiosity | -0.2 | -0.2 | 0.299 | -0.014 | 0.079 | 0.067 | 0.028 | 1 |
| **Sweden** | **1** | **2** | **3** | **4** | **5** | **6** | **7** | **8** |
| 1. Gay men | 1 | 0.891 | -0.439 | 0.243 | -0.156 | -0.028 | 0.143 | -0.101 |
| 1. Lesbian women | 0.891 | 1 | -0.386 | 0.191 | -0.119 | 0.012 | 0.104 | -0.091 |
| 1. Gender norm | -0.439 | -0.386 | 1 | -0.257 | 0.043 | -0.075 | -0.221 | 0.266 |
| 1. Female (vs. male) | 0.243 | 0.191 | -0.257 | 1 | -0.177 | -0.143 | 0.061 | 0.003 |
| 1. Age | -0.156 | -0.119 | 0.043 | -0.177 | 1 | 0.144 | 0.081 | 0.071 |
| 1. Income | -0.028 | 0.012 | -0.075 | -0.143 | 0.144 | 1 | 0.217 | -0.123 |
| 1. Education | 0.143 | 0.104 | -0.221 | 0.061 | 0.081 | 0.217 | 1 | -0.036 |
| 1. Religiosity | -0.101 | -0.091 | 0.266 | 0.003 | 0.071 | -0.123 | -0.036 | 1 |
| **Turkey** | **1** | **2** | **3** | **4** | **5** | **6** | **7** | **8** |
| 1. Gay men | 1 | 0.843 | -0.392 | 0.193 | -0.137 | -0.024 | 0.029 | -0.239 |
| 1. Lesbian women | 0.843 | 1 | -0.383 | 0.09 | -0.111 | -0.018 | 0.049 | -0.282 |
| 1. Gender norm | -0.392 | -0.383 | 1 | -0.232 | 0.161 | -0.07 | -0.115 | 0.419 |
| 1. Female (vs. male) | 0.193 | 0.09 | -0.232 | 1 | -0.079 | 0.071 | 0.046 | -0.007 |
| 1. Age | -0.137 | -0.111 | 0.161 | -0.079 | 1 | 0.171 | -0.023 | 0.036 |
| 1. Income | -0.024 | -0.018 | -0.07 | 0.071 | 0.171 | 1 | 0.26 | -0.056 |
| 1. Education | 0.029 | 0.049 | -0.115 | 0.046 | -0.023 | 0.26 | 1 | -0.103 |
| 1. Religiosity | -0.239 | -0.282 | 0.419 | -0.007 | 0.036 | -0.056 | -0.103 | 1 |
| **Great Britain** | **1** | **2** | **3** | **4** | **5** | **6** | **7** | **8** |
| 1. Gay men | 1 | 0.837 | -0.272 | 0.108 | -0.176 | -0.007 | 0.11 | -0.068 |
| 1. Lesbian women | 0.837 | 1 | -0.259 | 0.041 | -0.162 | 0.01 | 0.088 | -0.081 |
| 1. Gender norm | -0.272 | -0.259 | 1 | -0.191 | 0.116 | 0.053 | -0.159 | 0.347 |
| 1. Female (vs. male) | 0.108 | 0.041 | -0.191 | 1 | -0.083 | -0.079 | -0.005 | 0.007 |
| 1. Age | -0.176 | -0.162 | 0.116 | -0.083 | 1 | -0.077 | -0.183 | -0.084 |
| 1. Income | -0.007 | 0.01 | 0.053 | -0.079 | -0.077 | 1 | 0.315 | 0.059 |
| 1. Education | 0.11 | 0.088 | -0.159 | -0.005 | -0.183 | 0.315 | 1 | 0.08 |
| 1. Religiosity | -0.068 | -0.081 | 0.347 | 0.007 | -0.084 | 0.059 | 0.08 | 1 |
| **US** | **1** | **2** | **3** | **4** | **5** | **6** | **7** | **8** |
| 1. Gay men | 1 | 0.883 | -0.39 | 0.133 | -0.291 | 0.013 | 0.15 | -0.308 |
| 1. Lesbian women | 0.883 | 1 | -0.308 | 0.03 | -0.288 | 0.017 | 0.167 | -0.314 |
| 1. Gender norm | -0.39 | -0.308 | 1 | -0.333 | 0.135 | 0.019 | -0.117 | 0.376 |
| 1. Female (vs. male) | 0.133 | 0.03 | -0.333 | 1 | -0.078 | -0.037 | -0.056 | -0.029 |
| 1. Age | -0.291 | -0.288 | 0.135 | -0.078 | 1 | 0.129 | -0.21 | 0.093 |
| 1. Income | 0.013 | 0.017 | 0.019 | -0.037 | 0.129 | 1 | 0.264 | 0.044 |
| 1. Education | 0.15 | 0.167 | -0.117 | -0.056 | -0.21 | 0.264 | 1 | 0.03 |
| 1. Religiosity | -0.308 | -0.314 | 0.376 | -0.029 | 0.093 | 0.044 | 0.03 | 1 |
| **Peru** | **1** | **2** | **3** | **4** | **5** | **6** | **7** | **8** |
| 1. Gay men | 1 | 0.827 | -0.363 | 0.2 | -0.127 | 0.063 | -0.001 | -0.177 |
| 1. Lesbian women | 0.827 | 1 | -0.325 | 0.105 | -0.137 | 0.066 | 0.014 | -0.234 |
| 1. Gender norm | -0.363 | -0.325 | 1 | -0.202 | 0.038 | -0.146 | -0.02 | 0.354 |
| 1. Female (vs. male) | 0.2 | 0.105 | -0.202 | 1 | 0.059 | -0.094 | -0.034 | 0.006 |
| 1. Age | -0.127 | -0.137 | 0.038 | 0.059 | 1 | 0.286 | 0.219 | 0.027 |
| 1. Income | 0.063 | 0.066 | -0.146 | -0.094 | 0.286 | 1 | 0.389 | -0.109 |
| 1. Education | -0.001 | 0.014 | -0.02 | -0.034 | 0.219 | 0.389 | 1 | -0.051 |
| 1. Religiosity | -0.177 | -0.234 | 0.354 | 0.006 | 0.027 | -0.109 | -0.051 | 1 |

**Factor structure of gender norms measure**

We conducted factor analyses on our 10 items measuring gender norms. First, when collapsing across all countries, a factor analysis with Varimax rotation showed there are two factors, with Factor 2 measuring emotionality proscriptions for men (men should not be emotional, affectionate, or show when their feelings are hurt), and Factor 1 including all other measures (see Table S2).

When looking at each country individually, the factor structure of course varies from country to country. The 2 factors in Table S2 mirror the structure for data from: Argentina; Australia; Belgium; Brazil; Canada; France; Germany; Great Britain; Peru; Russia; and USA, and, to a lesser extent, Hungary, Poland, and South Africa. A one-factor solution fit data from Italy, Spain, Sweden, and South Korea. Unique two-factor solutions emerged for China, India, Japan, and Turkey.

Because the reliably of gender norms using all 10 items was high for each country (alphas>=.84), we opted to use the mean in our focal analyses. We get the same pattern of results (and same significance levels) if we use only the 7 items from Factor 1 (see Table S3). We plan to more thoroughly investigate the cross-national differences in factor structures of this measure in our future research with these data.

**Table S2**

*Results of factor analysis (with Varimax rotation) of 10 items used to construct gender norm scale*

| Item | Factor 1 | Factor 2 |
| --- | --- | --- |
| Men should not be too emotional | 0.39 | **0.74** |
| Men should not be affectionate | 0.15 | **0.84** |
| A man should never admit when others hurt his feelings | 0.28 | **0.81** |
| Men should be able to fix most things around the house | **0.78** | 0.22 |
| Boys should play with trucks rather than dolls | **0.68** | 0.42 |
| Men should be physically tough | **0.77** | 0.32 |
| Men should act masculine | **0.83** | 0.29 |
| Women should act feminine | **0.84** | 0.26 |
| Women should be caring and nurturing | **0.81** | 0.14 |
| Women should not be too dominant | **0.58** | 0.40 |

*Note*. **Bold font** indicates clustering of factors.

**Table S3**

*Estimates from multilevel model with random intercept and slope predicting attitudes using 7 items (vs. 10) to calculate gender norm endorsement*

|  | **Gay men** | | |  | **Lesbian women** | | |
| --- | --- | --- | --- | --- | --- | --- | --- |
|  | *b*(*SE*) | *p* | 95%CI |  | *b*(*SE*) | *p* | 95%CI |
| ***Fixed Effects*** |  |  |  |  |  |  |  |
| *Person-level variables* |  |  |  |  |  |  |  |
| Intercept | 4.85(.13) | <.001 | 4.58.5.13 |  | 5.32(.10) | <.001 | 5.11.5.53 |
| Female | .37(.03) | <.001 | .30..43 |  | .00(.03) | .909 | -.06..07 |
| Age | -.02(.00) | <.001 | -.02.-.02 |  | -.02(.00) | <.001 | -.02.-.02 |
| Education | .10(.02) | <.001 | .06..15 |  | .07(.02) | .004 | .02..12 |
| Income | .03(.03) | .288 | -.02..08 |  | .04(.02) | .117 | -.01..08 |
| Religiosity | -.09(.01) | <.001 | -.12.-.06 |  | -.13(01) | <.001 | -.16.-.11 |
| Gender norms1 | -.34(.04) | <.001 | -.42.-.26 |  | -.27(.03) | <.001 | -.34.-.20 |
| *Country-level variables* |  |  |  |  |  |  |  |
| LGBT rights | 2.36(.51) | <.001 | 1.30.3.43 |  | 1.97(.39) | <.001 | 1.15.2.79 |
| *Cross-level interactions* |  |  |  |  |  |  |  |
| LGBT rights * female | -.67(.13) | <.001 | -.93.-.40 |  | -.40(.13) | .002 | -.66.-.15 |
| LGBT rights * gender norms1 | -.18(.15) | .225 | -.49..12 |  | -.19(.13) | .146 | -.46..07 |
| ***Random Effects*** |  |  |  |  |  |  |  |
| Residual | 4.02(.05) | <.001 | 3.93.4.11 |  | 3.76(.04) | <.001 | 3.67.3.85 |
| Intercept | .38(.12) | .002 | .21..72 |  | .17(.06) | .003 | .09..32 |
| Female | .00(.01) | .452 | .00..11 |  | .04(.02) | .053 | .01..10 |
| Gender norms1 | .03(.01) | .003 | .02..06 |  | .02(.01) | .003 | .02..05 |
| *Cov*(female. intercept) | -.00(.03) | .790 | -.06..05 |  | .04(.02) | .068 | -.00..09 |
| *Cov*(gender norms. intercept) | .06(.03) | .032 | .00..12 |  | .03(.02) | .081 | -.00..06 |
| *Cov*(gender norms. female) | .00(.01) | .330 | -.01..02 |  | .02(.01) | .078 | -.00..05 |

*Note*. 1 Participant endorsement of gender norms based on mean level of seven items (vs. of ten items).
